# Supplementary material
Source: publisher figshare collection journal article supplement (https://karger.figshare.com/ndownloader/files/27670950)
Supplement: Supplementary file 1 [file 27670950]

**
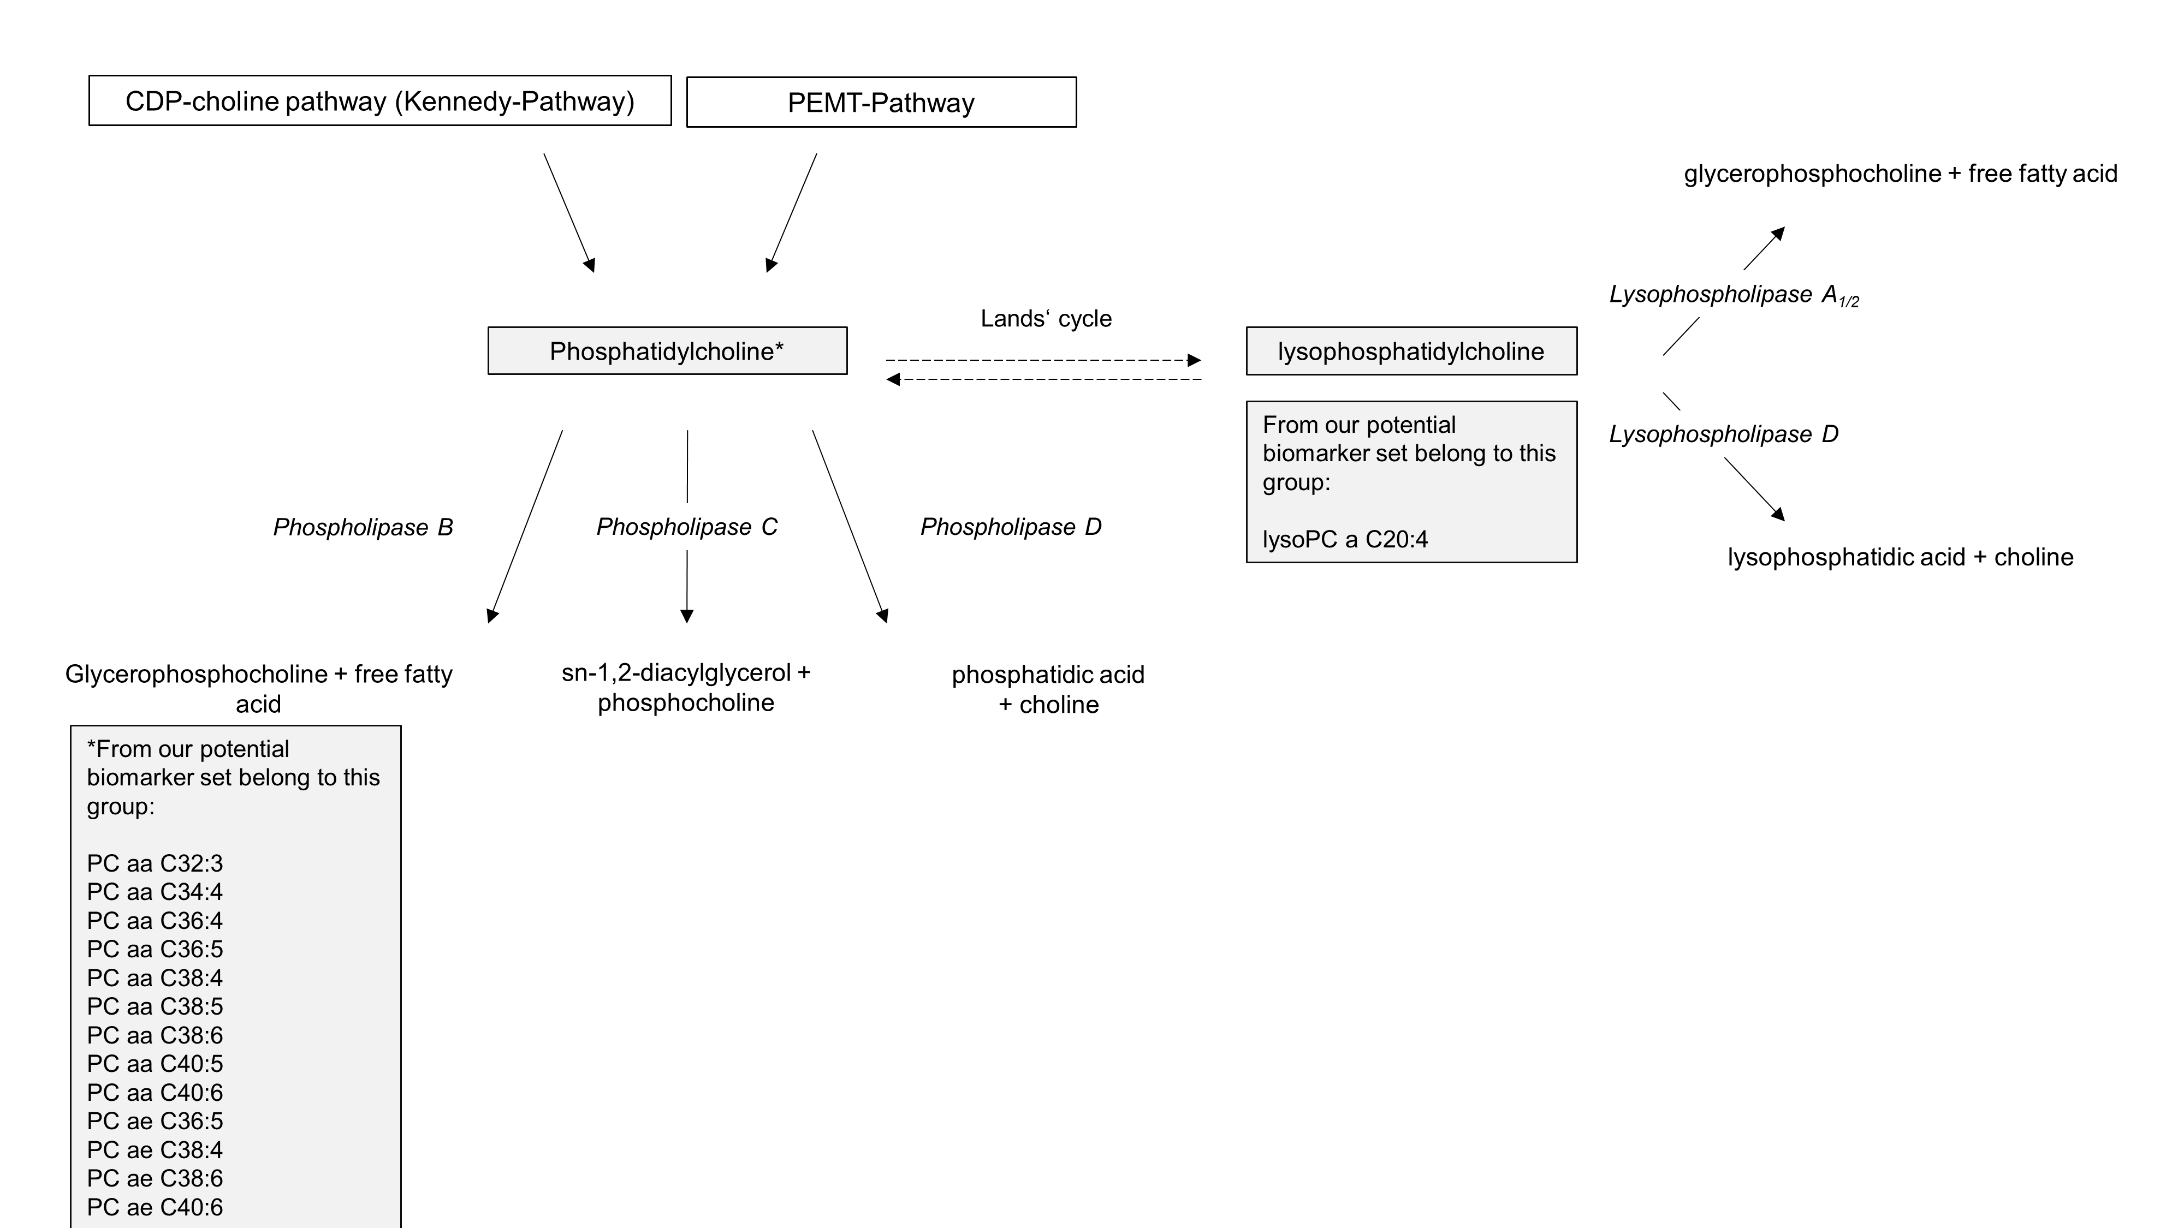
**

**Fig. S2**: Overview of phosphatidylcholine metabolism. In the liver about 30% of phosphatidylcholines are produced by the PEMT-pathway and 70% by the CDP-choline pathway (also called Kennedy-Pathway) [4]. Catalyzing enzymes are shown according to [1-4]. Phosphatidylcholines and lysophosphatidylcholines can be interconverted via the Lands’ cycle (see Fig. S3). Phosphatidylcholines can be degraded by different pathways, resulting in other biologically active molecules like phosphatidic acids catalyzed by lysophospholipase D (e.g., Autotaxin) [3]. Phosphatidylcholine and lysophosphatidylcholine species included in our potential biomarker set are shown.

References:

1. Gibellini F, Smith TK. The Kennedy pathway--De novo synthesis of phosphatidylethanolamine and phosphatidylcholine. IUBMB Life 2010;62:414-428.
2. Law SH, Chan ML, Marathe GK, et al. An Updated Review of Lysophosphatidylcholine Metabolism in Human Diseases. Int J Mol Sci2019;20.
3. Tokumura A, Majima E, Kariya Y, et al. Identification of human plasma lysophospholipase D, a lysophosphatidic acid-producing enzyme, as autotaxin, a multifunctional phosphodiesterase. J Biol Chem2002;277:39436-39442.
4. Vance DE. Phospholipid methylation in mammals: from biochemistry to physiological function. Biochim Biophys Acta2014;1838:1477-1487.
